# Supplementary material for: Fitness Cost of blaNDM-5-Carrying p3R-IncX3 Plasmids in Wild-Type NDM-Free Enterobacteriaceae
Source: PubMed Central journal article supplement (PMC7143814; doi:10.3390/microorganisms8030377), 2020-03-07
Supplement: microorganisms-08-00377-s001.pdf [file microorganisms-08-00377-s001.pdf]

**Table 1.** Numbers of recipient strains from different sources.

| Source           | Species        |                      |                    |                             |                             |                          |                           | Total |
|------------------|----------------|----------------------|--------------------|-----------------------------|-----------------------------|--------------------------|---------------------------|-------|
|                  | <i>E. coli</i> | <i>K. pneumoniae</i> | <i>Providencia</i> | <i>Enterobacter cloacae</i> | <i>Citrobacter freundii</i> | <i>Proteus mirabilis</i> | <i>Klebsiella oxytoca</i> |       |
| Environment      | 3              | 3                    | 1                  | 1                           | -                           | -                        | -                         | 8     |
| Chicken          | 3              | 3                    | -                  | -                           | -                           | 1                        | -                         | 7     |
| Meat             | 3              | 1                    | -                  | -                           | 1                           | -                        | 1                         | 6     |
| Fly              | 2              | 1                    | 1                  | 1                           | -                           | -                        | -                         | 5     |
| Human            | 6              | -                    | -                  | -                           | -                           | -                        | -                         | 6     |
| Swine            | 3              | 3                    | -                  | -                           | -                           | -                        | -                         | 6     |
| Companion animal | 3              | -                    | -                  | -                           | -                           | -                        | -                         | 3     |
| Total            | 23             | 11                   | 2                  | 2                           | 1                           | 1                        | 1                         | 41    |

**Table 2.** Detailed information on recipient strains and conjugative transfer results.

| Number | Species                     | Sources              | ST   | Conjugative transfer | Number | Species                        | Sources             | ST   | Conjugation transfer |
|--------|-----------------------------|----------------------|------|----------------------|--------|--------------------------------|---------------------|------|----------------------|
| 1      | <i>E. coli</i>              | chicken manure       | 354  | ✓                    | 22     | <i>E. coli</i>                 | fly on pig farm     | 871  | ✓                    |
| 2      | <i>E. coli</i>              | chicken manure       | 224  | ✓                    | 23     | <i>E. coli</i>                 | fly on chicken farm | 744  | ✓                    |
| 3      | <i>E. coli</i>              | chicken manure       | 43   | ✓                    | 24     | <i>K. pneumoniae</i>           | fly on chicken farm | 11   | ×                    |
| 4      | <i>K. pneumoniae</i>        | chicken feces        | 11   | ✓                    | 26     | <i>Enterobacter hormaechei</i> | fly on chicken farm | 7742 | ✓                    |
| 5      | <i>K. pneumoniae</i>        | soil in chicken farm | 789  | ×                    | 27     | <i>Providencia</i>             | fly on chicken farm | NF*  | ×                    |
| 6      | <i>K. pneumoniae</i>        | soil in chicken farm | 789  | ×                    | 28     | <i>E. coli</i>                 | human               | 131  | ✓                    |
| 7      | <i>Enterobacter cloacae</i> | chicken manure       | NF*  | ✓                    | T1     | <i>K. pneumoniae</i>           | swine               | 2981 | ✓                    |
| 8      | <i>Providencia</i>          | chicken manure       | NF*  | ×                    | T2     | <i>K. pneumoniae</i>           | swine               | 661  | ×                    |
| 9      | <i>E. coli</i>              | chicken cloaca swab  | 2732 | ×                    | T3     | <i>K. pneumoniae</i>           | swine               | 1086 | ✓                    |

---

|    |                              |                                           |        |       |                |                     |        |
|----|------------------------------|-------------------------------------------|--------|-------|----------------|---------------------|--------|
| 10 | <i>E. coli</i>               | chicken<br>cloaca swab                    | 1564 ✓ | A19   | <i>E. coli</i> | swine               | 542 ✓  |
| 11 | <i>E. coli</i>               | chicken<br>cloaca swab                    | 156 ✓  | C45   | <i>E. coli</i> | swine               | 216 ✓  |
| 12 | <i>Proteus mirabilis</i>     | chicken<br>cloaca swab                    | NF* ×  | D22   | <i>E. coli</i> | swine               | 206 ✓  |
| 13 | <i>K. pneumoniae</i>         | chicken<br>cloaca swab                    | 11 ✓   | 0970  | <i>E. coli</i> | companion<br>animal | 405 ✓  |
| 14 | <i>K. pneumoniae</i>         | chicken<br>cloaca swab                    | 395 ✓  | 1150  | <i>E. coli</i> | companion<br>animal | 10 ×   |
| 15 | <i>K. pneumoniae</i>         | chicken<br>cloaca swab                    | 11 ✓   | 10194 | <i>E. coli</i> | companion<br>animal | 617 ✓  |
| 16 | <i>E. coli</i>               | pork from<br>farmers<br>market<br>chicken | 542 ✓  | S43   | <i>E. coli</i> | human               | 1415 × |
| 17 | <i>E. coli</i>               | from<br>supermarket<br>chicken            | 2606 × | S51   | <i>E. coli</i> | human               | 359 ✓  |
| 18 | <i>E. coli</i>               | from<br>supermarket<br>chicken            | 58 ✓   | S69   | <i>E. coli</i> | human               | 744 ✓  |
| 19 | <i>Raoultella planticola</i> | from<br>supermarket                       | NF* ✓  | S73   | <i>E. coli</i> | human               | 190 ×  |
| 20 | <i>K. pneumoniae</i>         | pork from<br>retail store                 | NF* ✓  | S87   | <i>E. coli</i> | human               | 90 ✓   |

---

|                  |                             |                    |                                          |
|------------------|-----------------------------|--------------------|------------------------------------------|
| 21               | <i>Citrobacter freundii</i> | chicken            |                                          |
|                  |                             | from farmers NF* ✓ |                                          |
|                  |                             | market             |                                          |
|                  |                             | Conjugative        |                                          |
| Total stains: 41 |                             | transfer           | Conjugative transfer rate: 70.7% (29/41) |
|                  |                             | successfully: 29   |                                          |

✓ indicates successful conjugative transfer; × indicates that conjugative transfer was unsuccessful; NF\*, not found.

**Table 3.** Conjugative transfer success rates in different species.

| Species        | Total | Conjugation transfer successfully | Rate  |
|----------------|-------|-----------------------------------|-------|
| <i>E. coli</i> | 23    | 18                                | 78.3% |
| <i>K. p.</i>   | 11    | 7                                 | 63.6% |
| Others         | 7     | 4                                 | 57.1% |
| Total          | 41    | 29                                | 70.7% |

**Table 4.** Conjugative transfer success rates among strains from different sources.

| Source           | Total | Conjugative transfer successfully | Rate  |
|------------------|-------|-----------------------------------|-------|
| Environment      | 8     | 5                                 | 62.5% |
| Chicken          | 7     | 5                                 | 71.4% |
| Meat             | 6     | 5                                 | 83.3% |
| Fly              | 5     | 3                                 | 60.0% |
| Human            | 6     | 4                                 | 66.6% |
| Swine            | 6     | 5                                 | 83.3% |
| Companion animal | 3     | 2                                 | 66.6% |
| Total            | 42    | 29                                | 70.7% |

**Table 5.** Genome and plasmid information for donor strain *Escherichia coli* 3R.

|          | CDs  | Length (KB) | Plasmid typing | Resistance genes                                                                       | Secretion systems |
|----------|------|-------------|----------------|----------------------------------------------------------------------------------------|-------------------|
| Genome   | 4632 | 4886.9      |                | <i>tet(B)</i> , <i>dfirA12</i> , <i>floR</i> , <i>fosA</i> , <i>bla<sub>CTX-</sub></i> | Type II           |
|          |      |             |                | M-65                                                                                   |                   |
| Plasmid1 | 219  | 193.0       | IncFIB         |                                                                                        |                   |
| Plasmid2 | 110  | 94.9        | IncI1          | <i>bla<sub>CMY-2</sub></i>                                                             |                   |

---

|          |    |      |        |                             |         |
|----------|----|------|--------|-----------------------------|---------|
| Plasmid3 | 81 | 67.6 | IncFII | <i>bla</i> <sub>TEM-1</sub> |         |
| Plasmid4 | 61 | 46.1 | IncX3  | <i>bla</i> <sub>NDM-5</sub> | Type IV |

---

**Table 6.** Specific primers targeting the four plasmid types in *Escherichia coli* 3R.

| Primer name | Sequence(5'-3')      |
|-------------|----------------------|
| P1-F        | TGCACGAGTGGGTTACATCG |
| P1-R        | ACGCTCGTCGTTTGGTATGG |
| P2-F        | TCCGGTCACGAAATACTGGC |
| P2-R        | TTTACCTCAACGGCGGGAAG |
| P3-F        | ACGTAAGTATGCCACGGAAG |
| P3-R        | TACAGTTCAAACAGGCGGGG |
| P4-F        | GGTTTGGCGATCTGGTTTTC |
| P4-R        | CGGAATGGCTCATCACGATC |

**Table 7.** The Genbank accession numbers of strains. The complete genome sequences data of all tested strains in this study have been uploaded to NCBI database. In order to identify the strains, "M-" was added to all strain names before their previous names.

| Strain name | Accession number | Strain name | Accession number | Strain name   | Accession number |
|-------------|------------------|-------------|------------------|---------------|------------------|
| M-1         | JAALCP000000000  | M-28        | JAALBS000000000  | M-15-X3       | JAALAU000000000  |
| M-2         | JAALCO000000000  | M-T1        | JAALEZ000000000  | M-16-X3       | JAALAT000000000  |
| M-3         | JAALCN000000000  | M-T2        | JAALBR000000000  | M-18-X3       | JAALAS000000000  |
| M-4         | JAALCM000000000  | M-T3        | JAALBQ000000000  | M-19-X3       | JAALEY000000000  |
| M-5         | JAALCL000000000  | M-A19       | JAALBP000000000  | M-20-X3       | JAALEX000000000  |
| M-6         | JAALCK000000000  | M-C45       | JAALBO000000000  | M-21-X3       | JAALAR000000000  |
| M-7         | JAALCJ000000000  | M-D22       | JAALBN000000000  | M-22-X3       | JAALAQ000000000  |
| M-8         | JAALCI000000000  | M-0970      | JAALBM000000000  | M-23-X3       | JAALAP000000000  |
| M-9         | JAALCH000000000  | M-1150      | JAALBL000000000  | M-26-X3       | JAALAO000000000  |
| M-10        | JAALCG000000000  | M-10194     | JAALBK000000000  | M-28-X3       | JAALAN000000000  |
| M-11        | JAALCF000000000  | M-S43       | JAALBJ000000000  | M-T1-X3       | JAALEW000000000  |
| M-12        | JAALCE000000000  | M-S51       | JAALBI000000000  | M-T3-X3       | JAALAM000000000  |
| M-13        | JAALCD000000000  | M-S69       | JAALBH000000000  | M-A19-X3      | JAALAL000000000  |
| M-14        | JAALCC000000000  | M-S73       | JAALBG000000000  | M-C45-X3      | JAALAK000000000  |
| M-15        | JAALCB000000000  | M-S87       | JAALBF000000000  | M-D22-X3      | JAALAJ000000000  |
| M-16        | JAALCA000000000  | M-DH5a      | JAALBE000000000  | M-0970-X3     | JAALAI000000000  |
| M-17        | JAALBZ000000000  | M-1-X3      | JAALBD000000000  | M-10194-X3    | JAALAH000000000  |
| M-18        | JAALBY000000000  | M-2-X3      | JAALBC000000000  | M-S51-X3      | JAALAG000000000  |
| M-19        | JAALFB000000000  | M-3-X3      | JAALBB000000000  | M-S69-X3      | JAALAF000000000  |
| M-20        | JAALFA000000000  | M-4-X3      | JAALBA000000000  | M-S87-X3      | JAALAE000000000  |
| M-21        | JAALBX000000000  | M-7-X3      | JAALAZ000000000  | M-DH5a-X3     | JAALAD000000000  |
| M-22        | JAALBW000000000  | M-10-X3     | JAALAY000000000  | 3R_Chromosome | CP049348         |
| M-23        | JAALBV000000000  | M-11-X3     | JAALAX000000000  | 3R_Plasmid1   | CP049349         |
| M-26        | JAALBU000000000  | M-13-X3     | JAALAW000000000  | 3R_Plasmid2   | CP049350         |
| M-27        | JAALBT000000000  | M-14-X3     | JAALAV000000000  | 3R_Plasmid3   | CP049351         |
|             |                  |             |                  | 3R_Plasmid4   | CP049352         |

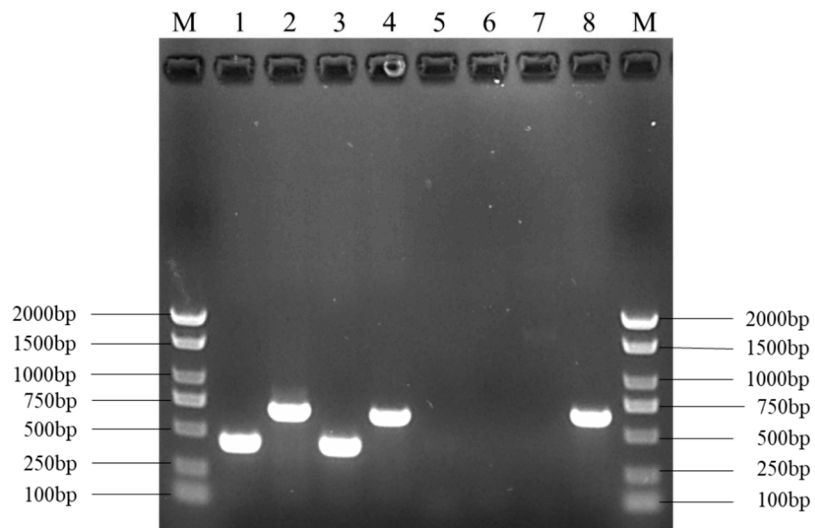

**Figure 1.** Verification of the IncX3 plasmid. Agarose gel electrophoresis of products amplified from the four plasmids found in *Escherichia coli* strains 3R and IncX3+DH5 $\alpha$ . Lane M, Biomed BM2000+; lanes 1–4, DNA from strain 3R was used as template; lanes 5–8, DNA from strain IncX3+DH5 $\alpha$  was used as template; lanes 1 and 5, primer pair TEM-1 (P1-1)-F/R was used to detect Plasmid 1; lanes 2 and 6, primer pair CMY-2 (P2-1)-F/R was used to detect Plasmid 2; lanes 3 and 7, primer pair Rep (P3-1)-F/R was used to detect Plasmid 3; lanes 4 and 8, primer pair NDM (P4-1)-F/R was used to detect Plasmid 4.

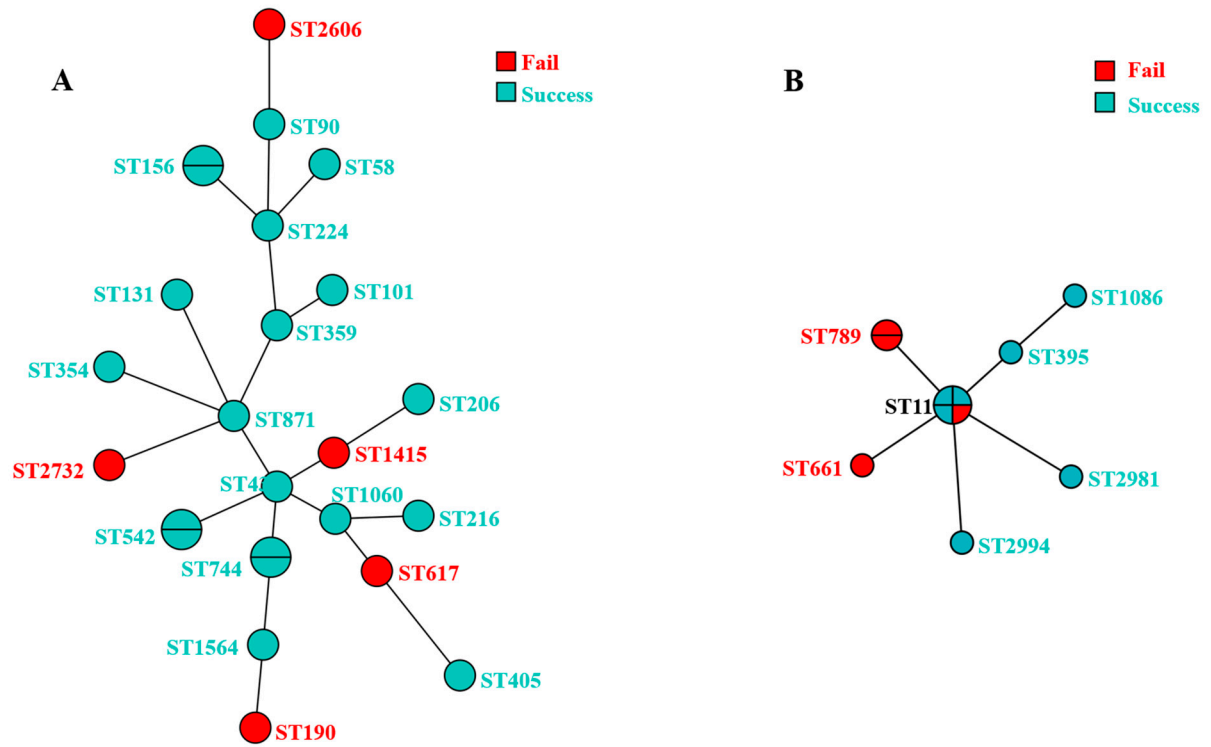

**Figure S2.** MLST-based clustering of recipient strains. (A) MLST cluster of the *Escherichia coli* recipient strains. (B) MLST cluster of the *Klebsiella pneumoniae* recipient strains. Green indicates successful conjugative transfer, while red indicates unsuccessful conjugative transfer.



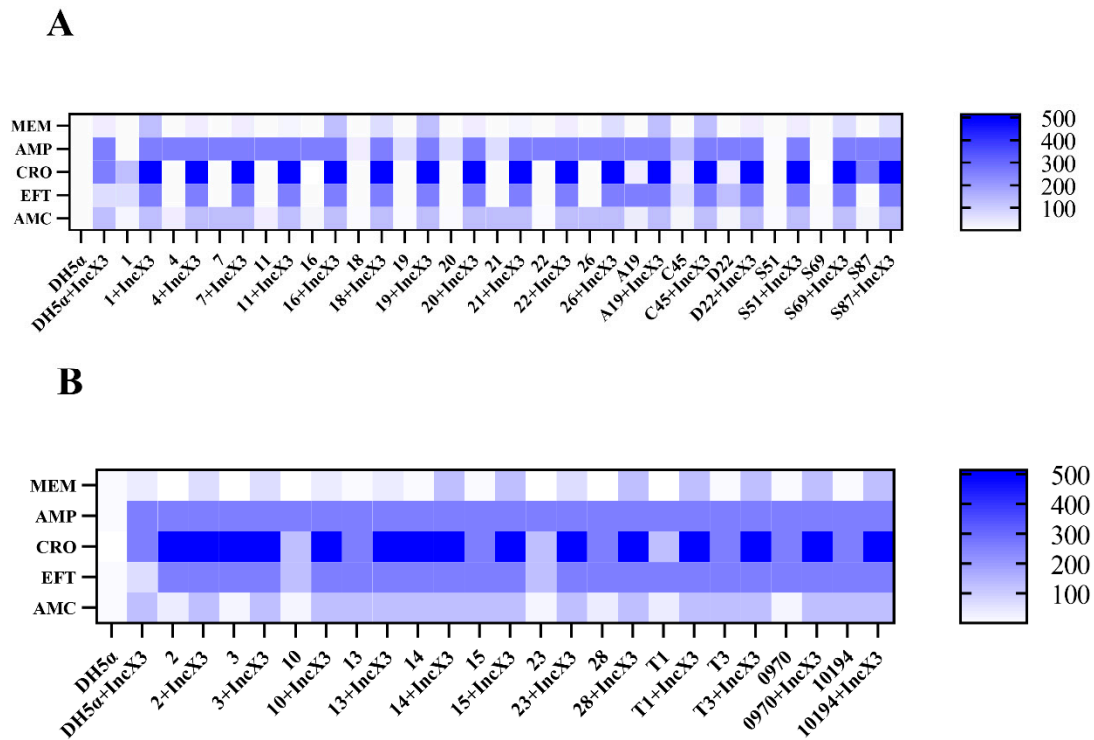

**Figure S3.** Changes in antimicrobial susceptibility profiles as a result of IncX3 plasmid acquisition. The heatmap indicates antimicrobial susceptibility changes among recipients after obtaining the IncX3 plasmid. Recipients shown in (A) were susceptible to the five  $\beta$ -lactam antibiotics, while the recipients in (B) were resistant. The darker the blue, the higher the MIC. MEM, meropenem; AMP, ampicillin; CRO, ceftriaxone; EFT, ceftiofur; AMC, amoxicillin/clavulanic acid.

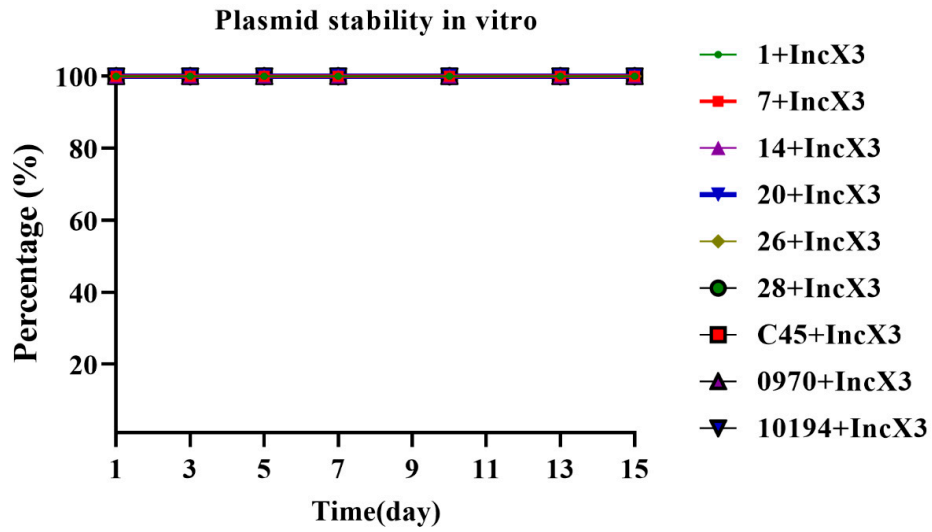

**Figure S4.** Stability of the IncX3 plasmid. Transconjugants from different sources were passaged continuously for 15 days in the absence of antibiotic pressure. Strain No. 1, ST354 *Escherichia coli* isolated from chicken manure compost; strain No. 7, *Enterobacter cloacae* isolated from chicken manure compost; strain No. 14, ST395 *Klebsiella pneumoniae* isolated from a chicken cloaca swab; strain No. 20, *K. pneumoniae* isolated from pork; strain No. 26, ST724 *Enterobacter hormaechei* isolated from a fly at a swine farm; strain No. 28, ST131 *E. coli* isolated from a human; strain C45, ST216 *E. coli* isolated from swine; strain 0970, ST405 *E. coli* isolated from a companion animal.
